# Supplementary material for: SLCO5A1 and synaptic assembly genes contribute to impulsivity in juvenile myoclonic epilepsy
Source: PubMed Central journal article supplement (PMC10539321; doi:10.1038/s41525-023-00370-z), 2023-09-28
Supplement: 41525_2023_370_MOESM1_ESM.pdf [file 41525_2023_370_MOESM1_ESM.pdf]

## Supplementary Figures

**Supplementary Figure 1. Flowchart of inclusion for the mega-GWAS and the European GWAS**

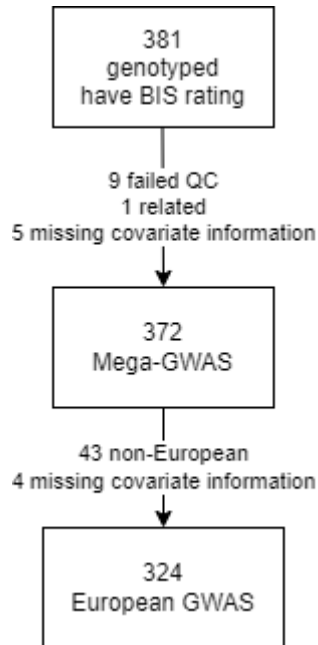

The mega-GWAS includes individuals of all ethnic backgrounds, while the main European GWAS includes those individuals within six standard deviations from the 1000 Genomes-defined European cluster.

**Supplementary Figure 2. The distribution of BIS-Brief**

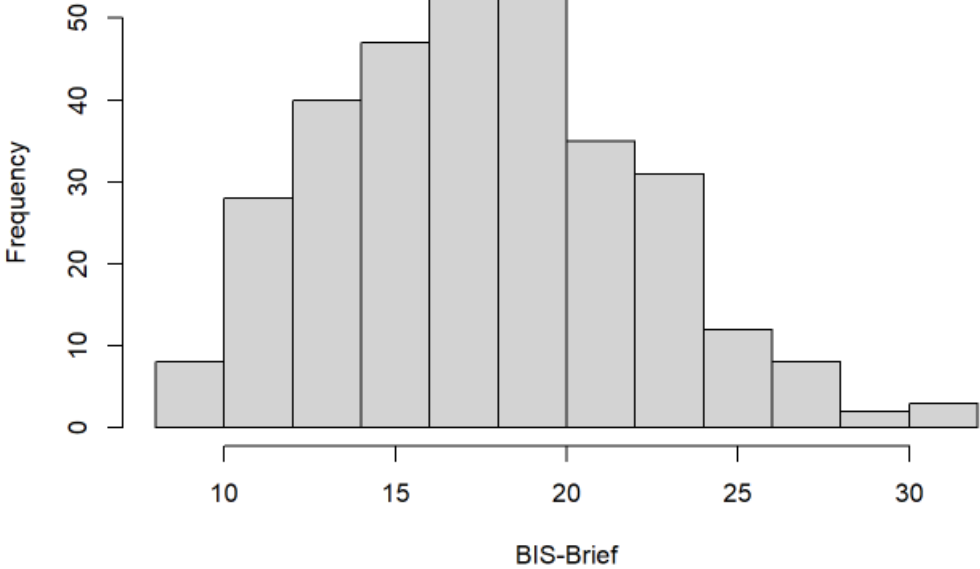

The plot shows the distribution of BIS-Brief in 324 European subjects with JME.

**Supplementary Figure 3. QQ plot of BIS-Brief GWAS (GC lambda = 0.998)**

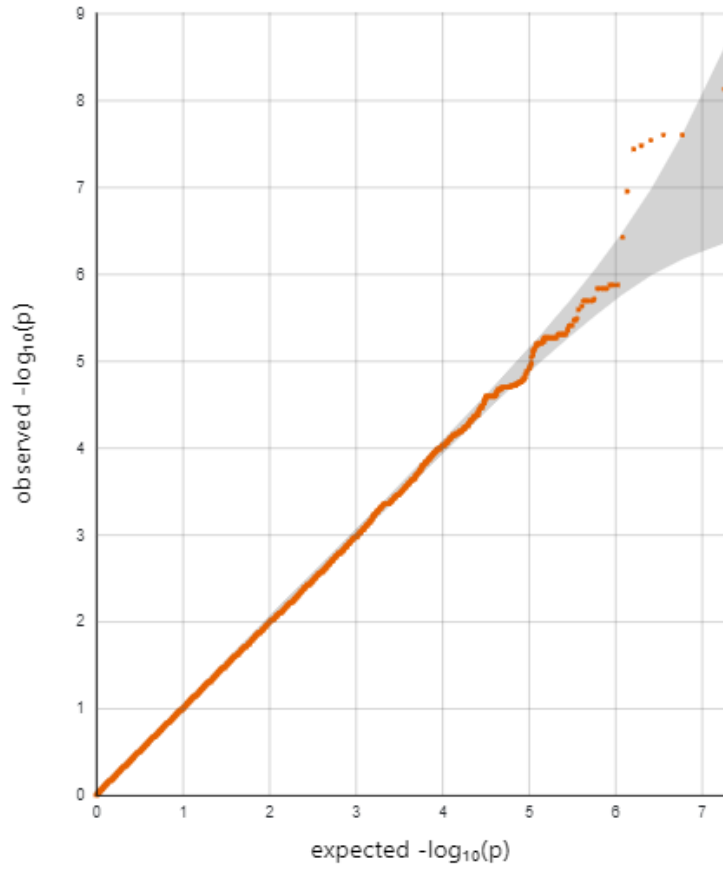

Linear regression was used to test association of each SNP with BIS-Brief. Sex, genotyping batch, age at consent, first 3 PCs, and the frequency of myoclonus or absence seizures were included as covariates in the model.

**Supplementary Figure 4. Histogram of p-values for BIS-Brief GWAS**

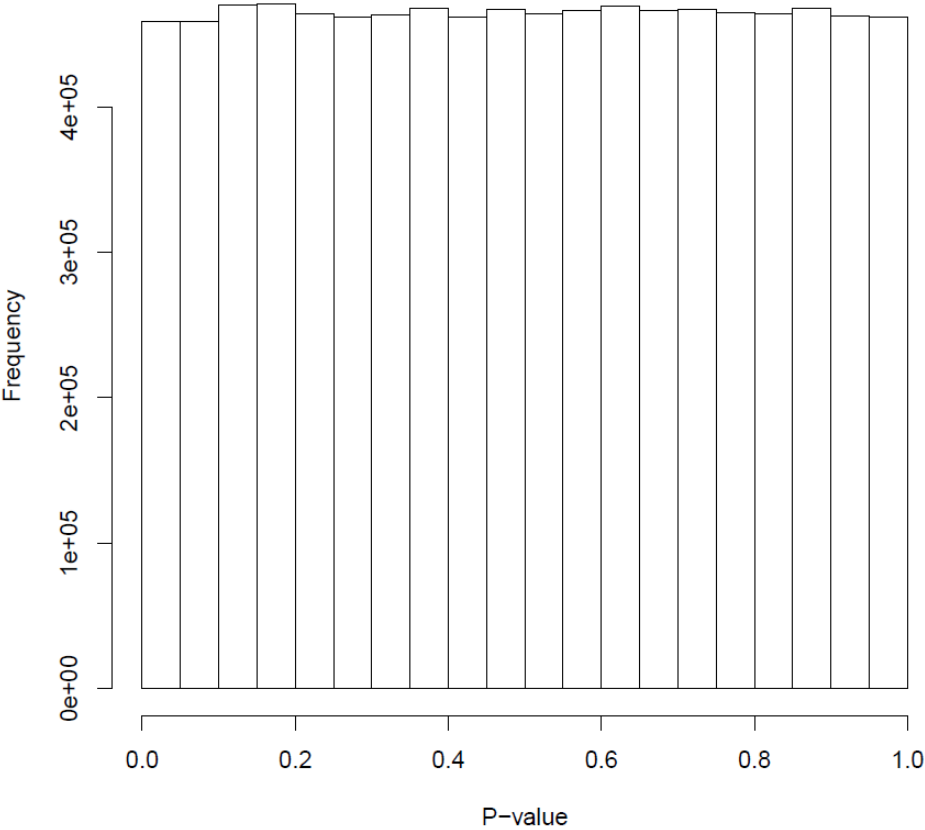

Linear regression was used to test association of each SNP with BIS-Brief. Sex, genotyping batch, age at consent, first 3 PCs, and the frequency of myoclonus or absence seizures were included as covariates in the model.

**Supplementary Figure 5. Distribution of BIS-Brief by rs73293634 and rs75042057 genotypes**

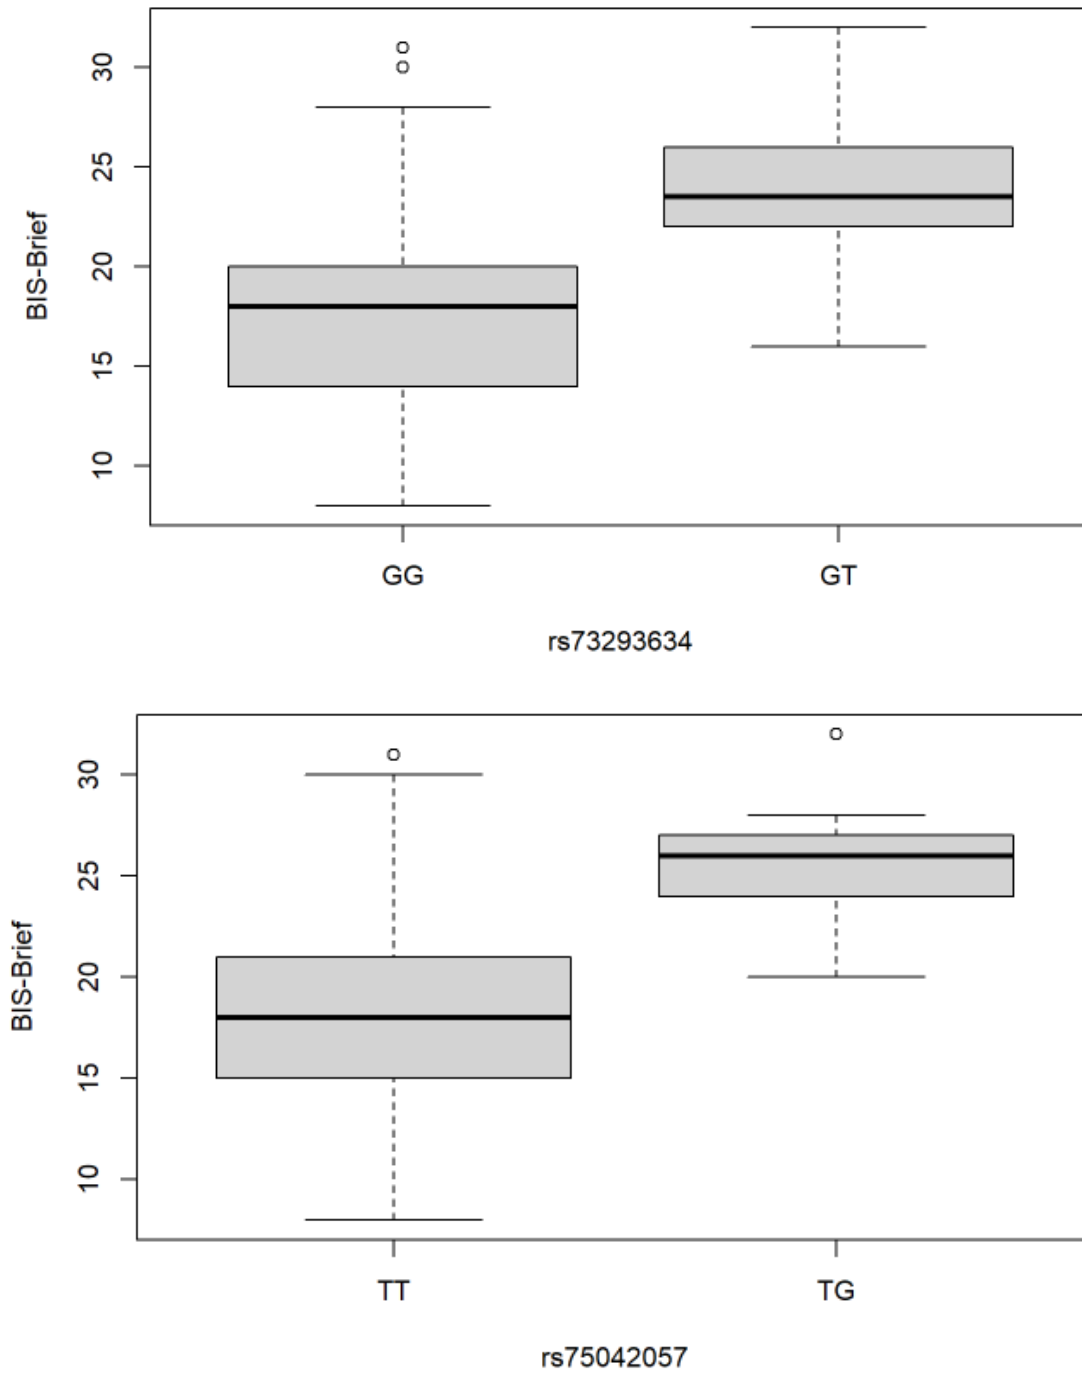

The center lines represent the 50th percentile (median) and the bounds of the boxes are the 75th and 25th percentiles (interquartile range) with the whiskers being the largest value within 1.5 times the interquartile range above the 75th percentile and smallest values within 1.5 times the interquartile range below the 25th percentile.

**Supplementary Figure 6. Principal component analysis (PCA) of all study samples with the 1000 Genomes (phase 3)**

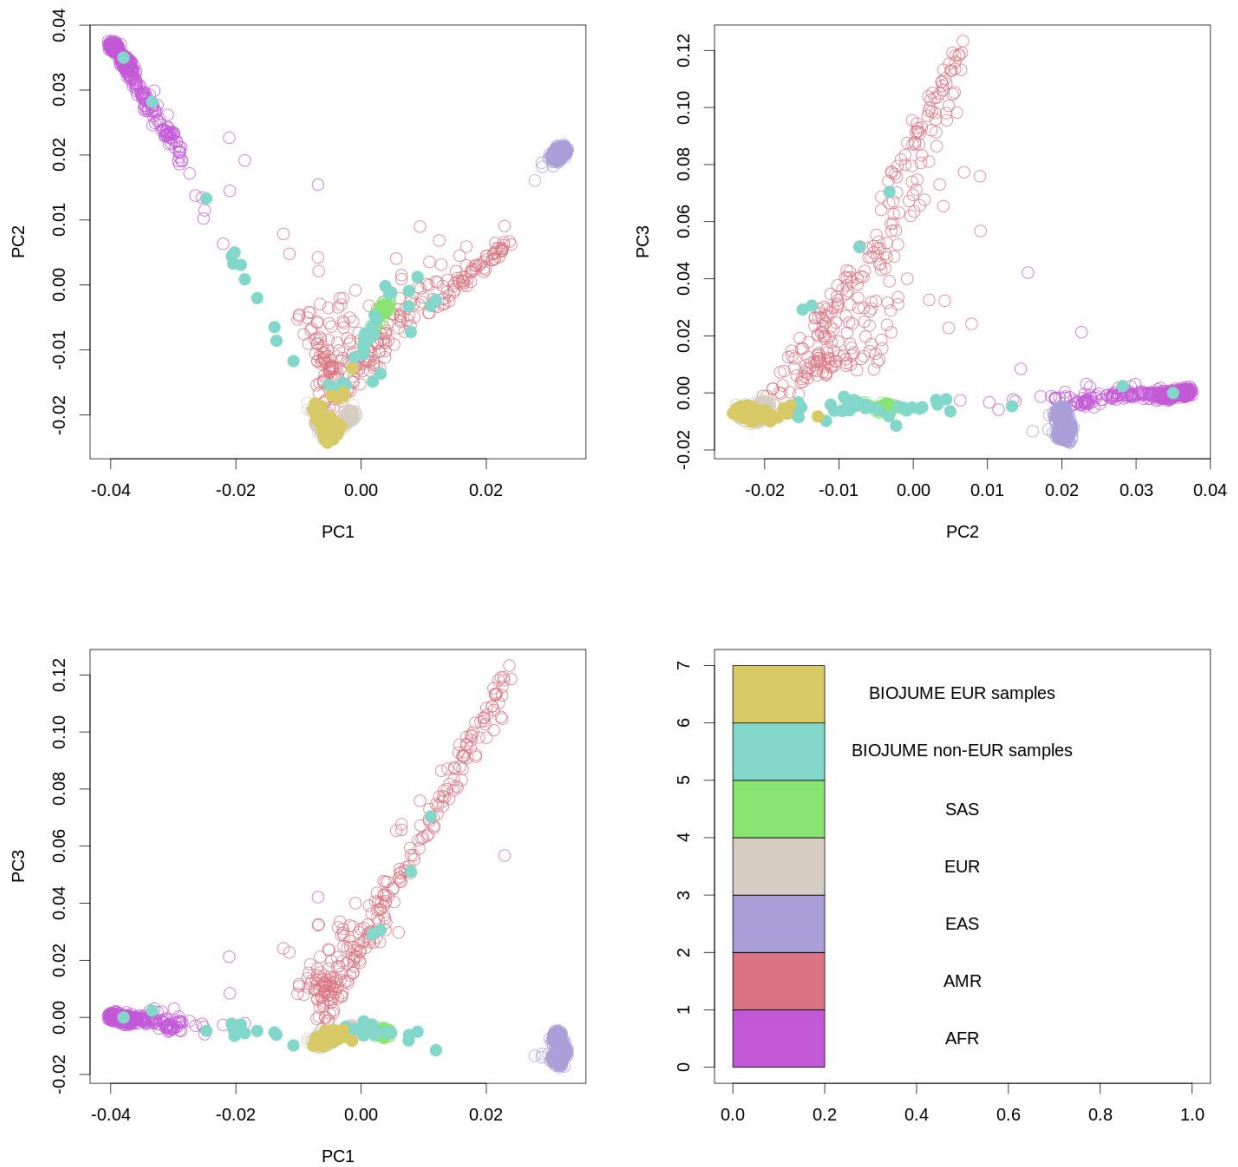

BIOJUME samples who were admixed or AMR were kept if they were within 6 standard deviations from the European cluster. SAS, South Asian; EUR, European; EAS, East Asian; AFR, African; AMR, Ad Mixed American.

**Supplementary Figure 7: Colocalization figure from LocusFocus<sup>1</sup> for the *SLCO5A1* gene**

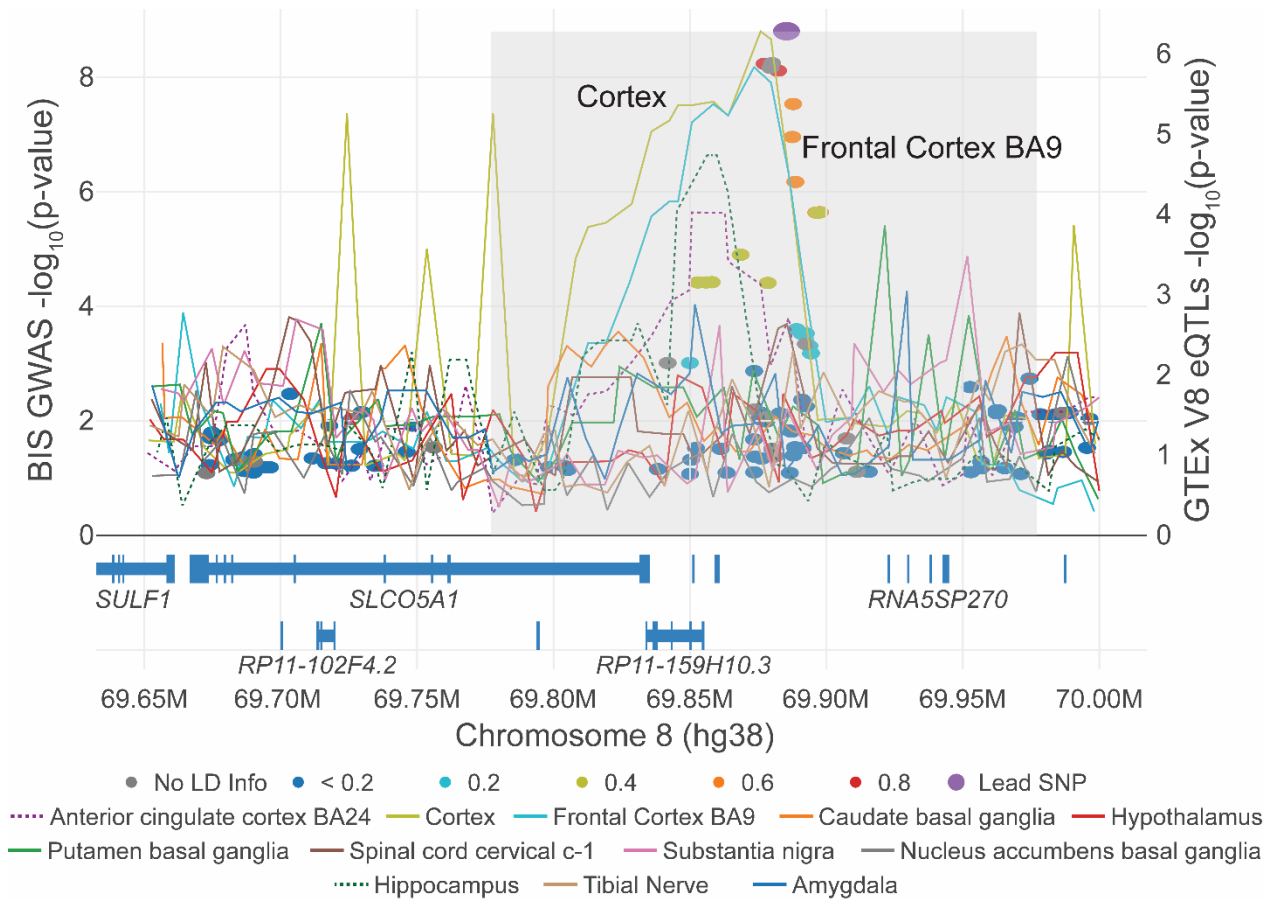

Same as in main Figure 2a, but circles depict the GWAS with BIS-Brief in the European subset (n=324). Colocalization analysis results reveal colocalization with GTEx<sup>2</sup> V8 brain cortex ( $-\log_{10}$  Simple Sum P-value (SSP) = 1.36), although this colocalization does not pass the multiple testing significance threshold of  $-\log_{10}$ SSP=2.0 for testing colocalization across eQTLs from GTEx<sup>2</sup>, PsychENCODE<sup>3</sup> and fetal brain eQTLs from O'Brien *et al.*<sup>4</sup>

**Supplementary Figure 8. Multiple sequence alignment of putative homologous sequences to human *SLC05A1* (first row): mouse *Slco5a1* (88.60% identity), *Oatp30B* from fly (*D. melanogaster*; 37.43% identity), and *Oatp26F* from fly (34.63% identity).**

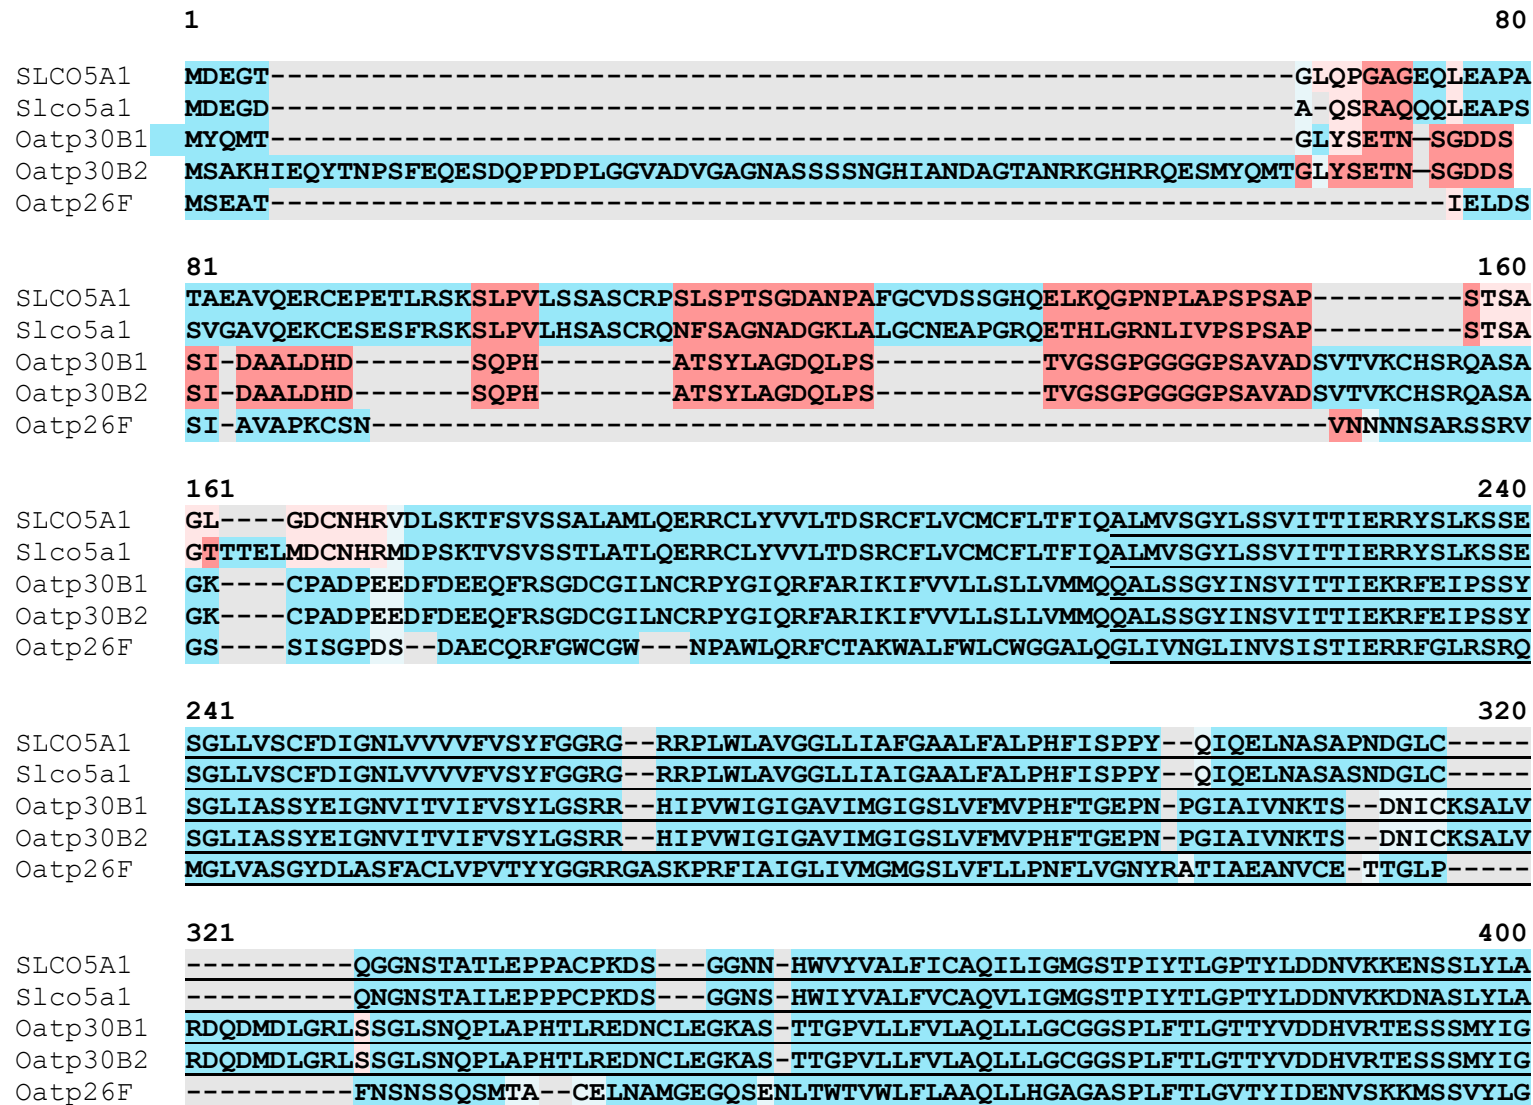



401 480  
SLC05A1 IMYVMGALGPAVGYLLGGLLIGFYVDP--NP--VHLDQNDPRFIGNWWSGFLLCAIAMFLVIFPMFTFPPKLPPRHKKK  
Slco5a1 IMYVMGALGPAVGYLLGGLLIGFYVDP--NP--VHLDQSDPRFIGNWWSGFLLCAIAMFLVIFPMFTFPPKLPPRHKKK  
Oatp30B1 FMYSMGAFGPVGFLGAYLLSFHMDSL--SSTTISITPGDRRWVGMWWGGFLLCGVILLVVAVPFFSFPKVLA-REKKK  
Oatp30B2 FMYSMGAFGPVGFLGAYLLSFHMDSL--SSTTISITPGDRRWVGMWWGGFLLCGVILLVVAVPFFSFPKVLA-REKKK  
Oatp26F IYYTMA TVGPAIGYVFGGQLLLIYTDWMTVDPVQLSLTSDSKVWIGAWWLGFI FAAMCLLIALPIFGYPKLLPGA EKLQ

481 560  
SLC05A1 KKKKFSVDAVSD-----DD-----VLKEKS-NNSEQADKKVSSMGFGKDVRDL PRAAVRILSNMTFLFVLSY  
Slco5a1 -KKF-SADVVID-----DD-----IIKEKS-NTSEQMNNKVS PMGFGKNVRDL PRAAVRILSNMTFLFVLSY  
Oatp30B1 IRKSSVQPVLPNNSRATVATDEM GKVKKLEIVAVTSKEDQS QAPPKVD-TGYGKDIKDI PQSMLRLVKNPVYIVTCLGA  
Oatp30B2 IRKSSVQPVLPNNSRATVATDEM GKVKKLEIVAVTSKEDQS QAPPKVD-TGYGKDIKDI PQSMLRLVKNPVYIVTCLGA  
Oatp26F LERVSEAHATI-----SEAD-----DSSNVVRGLPRAVLSLLANPTFFFLNLAG

561 640  
SLC05A1 TAESAI VTA FITFIPKFIESQFGIPASNASIYTGVIIVPSAGVIGV LGGYIIKKLKLGARESAKLAMICSGVSLLCFSTL  
Slco5a1 TAESAI VTA FITFIPKFIESQFGIPASNASIYTGVIIVPSAGVIGV LGGYIIKKLKLGARESAKLAMICSGVSLLCFSTL  
Oatp30B1 CMELMIVSGFVFLPKYLETQFSLGKSQANIFTGSI AVPGACIGIFLGGCILKRFQ LKPKGAVQFVLITNVICLACYAML  
Oatp30B2 CMELMIVSGFVFLPKYLETQFSLGKSQANIFTGSI AVPGACIGIFLGGCILKRFQ LKPKGAVQFVLITNVICLACYAML  
Oatp26F ATEGLVIAGFAAFLPKQIENQFSISPYSALVMGLITVPAGGGGTF LGGYLVKKWNLACRGI IKMCLLATTV A-ALFTIC

641 720  
SLC05A1 FIVGCESINLGGINIPYTT----GPSLTMPH-RNLTGSCNVNCGCKI HEYEPVCGSDGITYFNPCLAGCVNSGNLSTGIR  
Slco5a1 FIVGCESINLGGINIPYTT----GPSLTMPH-RNLTGSCNVNCGCKI HEYEPVCGSDGITYFNPCLAGCINSGNLTTGVR  
Oatp30B1 FFLGCDNLK MAGTTIPYYTSNKHGSTLEQPFQVNLTAACNFGCECLTSEVEPVCGNNGLT YFSPCHAGCTAFS--STSNT  
Oatp30B2 FFLGCDNLK MAGTTIPYYTSNKHGSTLEQPFQVNLTAACNFGCECLTSEVEPVCGNNGLT YFSPCHAGCTAFS--STSNT  
Oatp26F FLVSCP NPKFAGVTTGYKM----QPSSDSP---ALVASCNSNCGCSRTNYD PICGVDGVMYSPCYAGCVQEEH-ANSLK

721 800  
SLC05A1 NYTECTCVQSRQVITPPTV GQRSQLRVVIVKTYLN---ENGYAVSGKCKRTCNTLIPFLVFLFIVTFITACAQPSAIIVT  
Slco5a1 NYTECTCVQSRQVITPPTV GQRSQLRVVIVKTYLN---ENGYAVSGKCKRTCNTLIPFLVFLFIVTFITACAQPSAIIVT  
Oatp30B1 NYTNCACVRANISSSIYRGAGGSQAQALSANENFAEVTVPVATAGPCATPCRTIYPFLI LFFM TFLVASTQMP LLMIV  
Oatp30B2 NYTNCACVRANISSSIYRGAGGSQAQALSANENFAEVTVPVATAGPCATPCRTIYPFLI LFFM TFLVASTQMP LLMIV  
Oatp26F RYHNCSCIEQVGFVD--DGNPSSEAP-----HFRPDATNRKCDSTCQTLPLFVALCFILMVFTFLATMPALSAT

801 880  
SLCO5A1 LRSVEDEERPFALGMQFVLLRRLTLAYIPTPIYFGAVIDTTCMLWQQECGV-Q-GSCWEYNVTSFRFVYFG-LAAGLKFBVGF  
Slco5a1 LRSVEDEERPFALGMQFVLLRRLTLAYIPTPIYFGAVIDTTCMLWQQECGV-Q-GSCWEYNVTSFRFVYFG-LAAGLKFBVGF  
Oatp30B1 LRSVSEEERSFALGMQFVIFRFLFGYIPAPILFGNLIDSTCILWKSSCGE-KGGRCLIIDIEKFRYKYVG-LCASVKLIAL  
Oatp30B2 LRSVSEEERSFALGMQFVIFRFLFGYIPAPILFGNLIDSTCILWKSSCGE-KGGRCLIIDIEKFRYKYVG-LCASVKLIAL  
Oatp26F LRCVQDDQRSFALGLQWIKVRLGTLIPAPLIFGALIDESCILWQESCDKDAGGACLVYDNFYI-SRYMWLLALICKLGSV

881 960  
SLCO5A1 IFIFLAWYSIKYKEDGLQRRRQREFPLST-----  
Slco5a1 IFIFLAWYSIKYKEDGLQRRRCREFPLST-----  
Oatp30B1 VIFMVDWWLVRRRQ-LEKM---KPLNASDPIIGSIISLDKLFEEKLSGAEPSTAFVGGGGELIIPTDILRHSRNDST  
Oatp30B2 VIFMVDWWLVRRRQ-LEKM---KPLNASDPIIGSIISLDKLFEEKLSGAEPSTAFVGGGGELIIPTDILRHSRNDST  
Oatp26F VFFACAWWFYVPP-----S---KPLNA-----

961 1040  
SLCO5A1 -----VSERVGHF-D-----NARTRSCPAF-----  
Slco5a1 -----VSEQVGF-SKAEKYSRTTSCPAF-----  
Oatp30B1 MHMDYCYDKCGRVVTANTCNQPQTKSKKHFRSASCDVKMIKSFARDHSSSSGPADAAGQDAVGASTKYKNLKKFQAHTR  
Oatp30B2 MHMDYCYDKCGRVVTANTCNQPQTKSKKHFRSASCDVKMIKSFARDHSSSSGPADAAGQDAVGASTKYKNLKKFQAHTR  
Oatp26F -----

1041 1120  
SLCO5A1 -----STQGEF-----  
Slco5a1 -----STQGEV-----  
Oatp30B1 NHSTDLHDPSQPIRYIQNQLRPQDCPEEDDDEELTTGCGHFVKKHSRNSYDQIYMPNNIRFDADFLRHPHSHHPKKNV  
Oatp30B2 NHSTDLHDPSQPIRYIQNQLRPQDCPEEDDDEELTTGCGHFVKKHSRNSYDQIYMPNNIRFDADFLRHPHSHHPKKNV  
Oatp26F -----

1121 1200  
SLCO5A1 -----HE-----ETGLQKGIQCAAQTYP-----GPFPE  
Slco5a1 -----HE-----ETALQKGFPTTQTYP-----GPFSE  
Oatp30B1 NVLKNVSDVGKLNKSNEIEAGGAGSRGHSRNSKDLNNTKISSATPASGQVVTDASTTGLSVLRHRRNTSKDLNYQVLPE  
Oatp30B2 NVLKNVSDVGKLNKSNEIEAGGAGSRGHSRNSKDLNNTKISSATPASGQVVTDASTTGLSVLRHRRNTSKDLNYQVLPE  
Oatp26F -----

```

1201                                     1251
SLCO5A1  AISSSADPG-----LEESPAALEPPS
Slco5a1  AVSSSADPG-----QDESP---DAAL
Oatp30B1 SAASSSVSGHAHPQHTRNTSHHKIQIDDDRNELINDNDDEEEER---SACA
Oatp30B2 SAASSSVSGHAHPQHTRNTSHHKIQIDDDRNELINDNDDEEEER---SACA
Oatp26F  -----NGK---EDVN

```

Alignment confidence (per residue): high **9876543210** low

| Domain       | Corresponding residues in human <i>SLCO5A1</i> (source: Pfam) |
|--------------|---------------------------------------------------------------|
| <b>MFS_1</b> | 135-529                                                       |
| <b>OATP</b>  | 129-734                                                       |
| <b>Kazal</b> | 549-603                                                       |

Overlapping domain regions are underlined.

The multiple sequence alignment was performed using MUSCLE5.<sup>5</sup> All sequences have a Kazal-like domain (shown in red).

Supplementary Figure 9. (a) *Oatp30B* mRNA levels as measured by qPCR (b) Reduced lifespan in flies with *Oatp30B* knock-down. (c) Unchanged speed during action. (d) Unaffected duration of single action bouts. (e) Unaffected rest interval in between single action bouts.

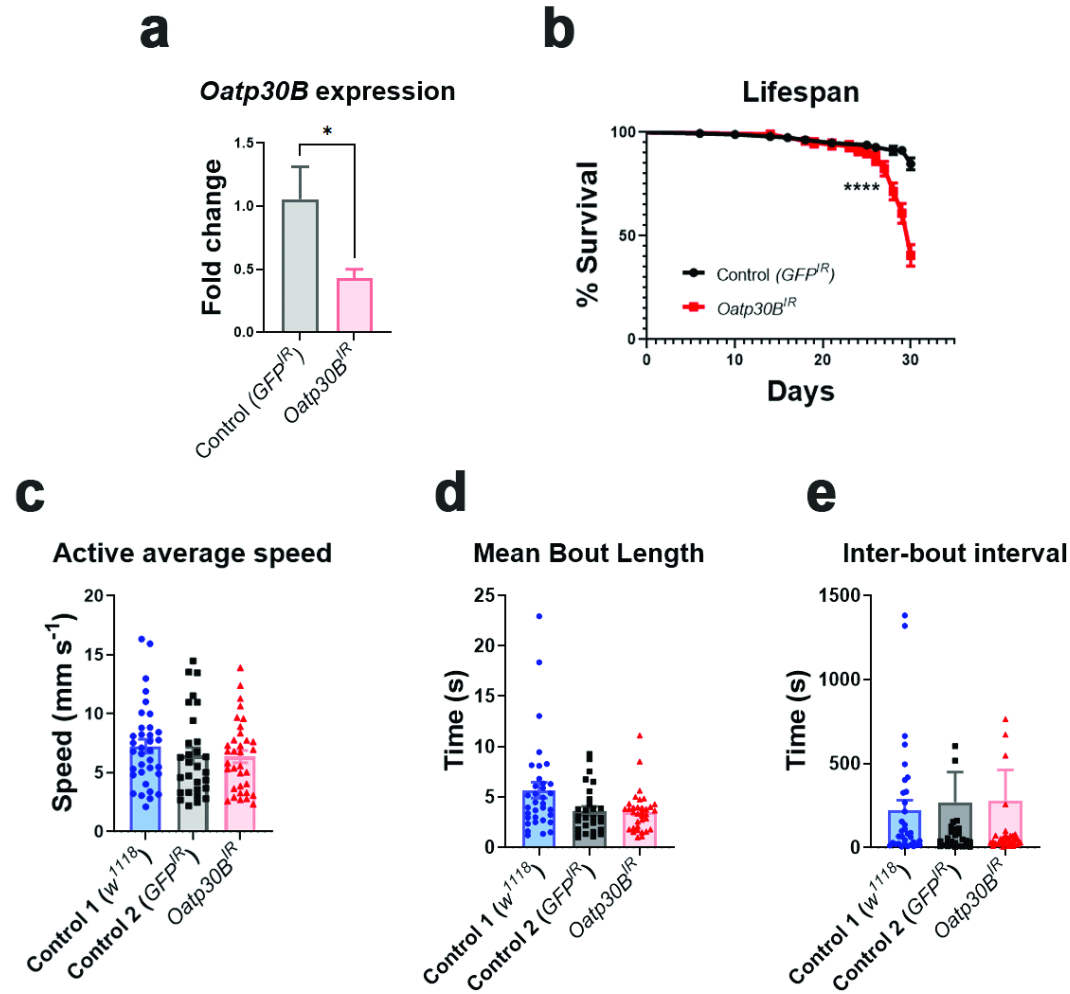

a: The *UAS-Oatp30B<sup>IR</sup>* (GD12775) transgenic or the control *UAS-GFP<sup>IR</sup>* were driven with *Tub-Gal4* and *Ubi-Gal80ts*. The graph reports data from 3 biological samples (n=10 flies, both males and females) and 5 technical replicates. Mean +/- SEM \* P<0.05, Unpaired t-test, one-tailed.

b: The *UAS-Oatp30B<sup>IR</sup>* (GD12775) transgenic or the control *UAS-GFP<sup>IR</sup>* were driven with *nSyb-Gal4* and *Ubi-Gal80ts*. Percent +/- SE \*\*\*\* P<0.0001, Log-rank (Mantel-Cox) test,  $\chi^2$  51.74 for 1 df, n=119-194.

c: The *UAS-Oatp30B<sup>IR</sup>* (GD12775) transgenic or the control *UAS-GFP<sup>IR</sup>* were driven with *nSyb-Gal4* and *Ubi-Gal80ts*. The *w<sup>1118</sup>* strain is a control for the genetic background in absence of transgenes.

d: Flies as in c.

e: Flies as in c.

**Supplementary Figure 10. BIS-Brief score vs. ADHD PRS deciles**

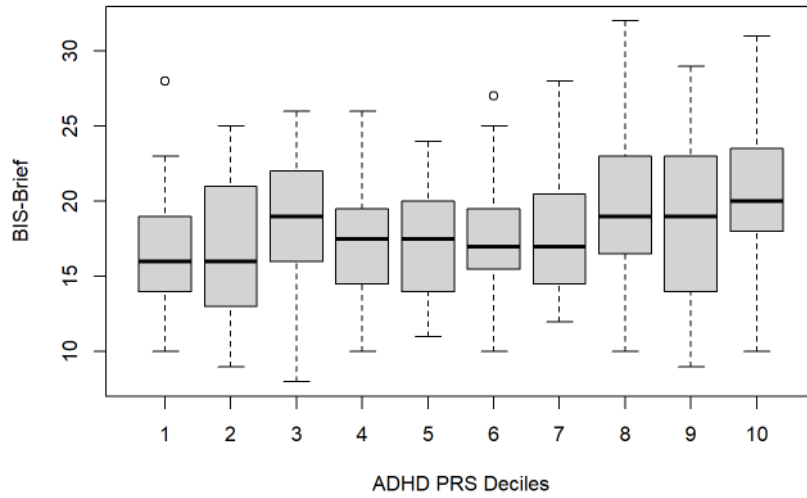

The center lines represent the 50th percentile (median) and the bounds of the boxes are the 75th and 25th percentiles (interquartile range) with the whiskers being the largest value within 1.5 times the interquartile range above the 75th percentile and smallest values within 1.5 times the interquartile range below the 25th percentile.

## Supplementary Tables

**Supplementary Table 1: Methods applied for the computation of PRS.**

| Disease                     | Summary statistics                 |                                  |                   |                                                                                                                                                                                      | BIOJUME           | Clumping + Thresholding       |                   |
|-----------------------------|------------------------------------|----------------------------------|-------------------|--------------------------------------------------------------------------------------------------------------------------------------------------------------------------------------|-------------------|-------------------------------|-------------------|
|                             | Study                              | Sample size                      | Ethnicity         | Variant filtering                                                                                                                                                                    | Variant Filtering | Clumping                      | p-value Threshold |
| <b>ADHD</b>                 | Demontis et al., 2019 <sup>6</sup> | 19,099 cases & 34,194 controls   | European          | MAF $\leq 0.05$<br>$r^2 \leq 0.8$<br>Indels<br>Ambiguous SNPs<br>Multi-allelic SNPs<br>MHC region                                                                                    | $r^2 \leq 0.5$    | $r^2$ : 0.3<br>radius: 500 kb | 0.1               |
| <b>Risk Taking</b>          | UK Biobank <sup>7</sup>            | 348,549                          | European          | MAF $\leq 0.05$<br>Info $\leq 0.8$<br>Indels<br>Ambiguous SNPs<br>Multi-allelic SNPs                                                                                                 | $r^2 \leq 0.5$    | $r^2$ : 0.1<br>radius: 500 kb | 0.05*             |
| <b>Bipolar Disorder</b>     | Stahl et al., 2019 <sup>8</sup>    | 20,352 cases and 31,358 controls | European          | MAF $\leq 0.05$<br>Info $\leq 0.9$<br>Indels<br>Ambiguous SNPs<br>Multi-allelic SNPs<br>MHC region except for the most significant associated SNP (rs36034627, Chr6:27,269,584, T>G) | $r^2 \leq 0.5$    | $r^2$ : 0.1<br>radius: 500 kb | 0.2               |
| <b>Generalized epilepsy</b> | ILAE Consortium, 2018 <sup>9</sup> | 15,212 cases & 29,677 controls   | Majority European | MAF $\leq 0.02$<br>$r^2 \leq 0.3$<br>Ambiguous SNPs                                                                                                                                  | $r^2 \leq 0.5$    | $r^2$ : 0.1<br>radius: 500 kb | 0.5               |
| <b>Focal epilepsy</b>       | ILAE Consortium, 2018 <sup>9</sup> | 15,212 cases & 29,677 controls   | Majority European | MAF $\leq 0.02$<br>$r^2 \leq 0.3$<br>Ambiguous SNPs                                                                                                                                  | $r^2 \leq 0.5$    | $r^2$ : 0.1<br>radius: 500 kb | 0.5               |

Clumping and thresholding were used to calculate ADHD, risk taking, bipolar disorder, generalized epilepsy, and focal epilepsy PRS in individuals of European ancestry using PLINK v1.9.<sup>10</sup> PRS values were generated by weighting selected SNPs after clumping and thresholding by the additive scale effect ( $\log_{10}(\text{OR})/\text{Beta}$ ), and then summing over the variants.

For generalized and focal epilepsy PRSs, we tested 10 different p-value thresholds (5E-8, 1E-6, 1E-4, 1E-3, 1E-2, 0.05, 0.1, 0.2, 0.5, 1), and 0.05 explained the highest proportion of variation in BIS-Brief score ( $R^2 = 0.016$ ).

MHC region: The major histocompatibility complex region, chr6:25-34Mbp

ILAE: International League Against Epilepsy

The methods applied to calculate generalized and focal epilepsy PRS are based on Leu et al. 2019.<sup>11</sup>



**Supplementary Table 2: Univariate analysis with BIS-Brief**

| <b>Variable</b>                        | <b>Beta</b> | <b>Standard Error</b> | <b>P-value</b>       |
|----------------------------------------|-------------|-----------------------|----------------------|
| Sex                                    | -1.36       | 0.51                  | $8.0 \times 10^{-3}$ |
| Age at consent                         | 0.042       | 0.028                 | 0.13                 |
| Myoclonus or absence seizure frequency | 1.09        | 0.25                  | $2.2 \times 10^{-5}$ |
| PC1                                    | 3.96        | 5.05                  | 0.43                 |
| PC2                                    | -4.48       | 5.42                  | 0.41                 |
| PC3                                    | 4.30        | 4.39                  | 0.33                 |
| Cohort 2                               | 1.41        | 0.78                  | 0.071                |
| Cohort 3                               | 1.49        | 0.92                  | 0.10                 |
| Cohort 4                               | 1.66        | 0.79                  | 0.035                |

Linear regression was used to test association of each variable with BIS-Brief in 324 European individuals with JME. We have previously shown the association of sex and seizure frequency with BIS-Brief.<sup>12</sup> Seizure frequency was used as a marker of controlled seizures and was defined as missing if there was no reported myoclonus frequency; otherwise, it was the maximum observed frequency for myoclonus or absence seizure as follows: daily seizures=3; weekly=2; less than weekly=1; none (currently or ever)=0. Cohort refers to the genotyping batch; samples recruited were genotyped in four batches at different time points.

**Supplementary Table 3: Association of top BIS-Brief GWAS SNPs with inverse rank normal transformed BIS-Brief (N = 324)**

| <b>Variant ID</b> | <b>Position (hg38)</b> | <b>Alleles</b> | <b>Beta</b> | <b>SE</b> | <b>P-value</b> |
|-------------------|------------------------|----------------|-------------|-----------|----------------|
| rs73293634        | chr8:69,884,968        | G/T            | 1.2         | 0.2       | 3.1E-8         |
| rs75042057        | chr10:34,202,650       | T/G            | 1.6         | 0.3       | 1.4E-7         |

Linear regression was used to test association of each SNP with inverse rank normal transformed BIS-Brief. Sex, genotyping batch, age at consent, first 3 PCs, and the frequency of myoclonus or absence seizures were included as covariates in the model.

**Supplementary Table 4: Association of ADHD, bipolar disorder, and focal and general epilepsy PRS with BIS-Brief**

| <b>PRS</b>                      | <b><math>\beta</math></b> | <b>SE</b> | <b>P</b> |
|---------------------------------|---------------------------|-----------|----------|
| <b>ADHD</b>                     | 0.09                      | 0.03      | 1.60E-3  |
| <b>Risk Taking</b>              | 2.14                      | 0.90      | 1.83E-2  |
| <b>Bipolar Disorder</b>         | 0.07                      | 0.04      | 0.080    |
| <b>Generalized Epilepsy PRS</b> | -0.03                     | 0.03      | 0.33     |
| <b>Focal Epilepsy PRS</b>       | 0.002                     | 0.045     | 0.96     |

Association of each PRS with BIS-Brief was tested using linear regression with age, sex, and frequency of absence/myoclonic seizure as covariates in the model.

## References

- 1 Panjwani, N. *et al.* LocusFocus: Web-based colocalization for the annotation and functional follow-up of GWAS. *PLoS Comput Biol* **16**, e1008336, doi:10.1371/journal.pcbi.1008336 (2020).
- 2 GTEx Consortium. The Genotype-Tissue Expression (GTEx) project. *Nat Genet* **45**, 580-585, doi:10.1038/ng.2653 (2013).
- 3 Wang, D. *et al.* Comprehensive functional genomic resource and integrative model for the human brain. *Science* **362**, doi:10.1126/science.aat8464 (2018).
- 4 O'Brien, H. E. *et al.* Expression quantitative trait loci in the developing human brain and their enrichment in neuropsychiatric disorders. *Genome Biol* **19**, 194, doi:10.1186/s13059-018-1567-1 (2018).
- 5 Edgar, R. C. MUSCLE: multiple sequence alignment with high accuracy and high throughput. *Nucleic Acids Res* **32**, 1792-1797, doi:10.1093/nar/gkh340 (2004).
- 6 Demontis, D. *et al.* Discovery of the first genome-wide significant risk loci for attention deficit/hyperactivity disorder. *Nat Genet* **51**, 63-75, doi:10.1038/s41588-018-0269-7 (2019).
- 7 Neale's Lab UK Biobank GWAS Results Round 2 (Imputed v3 - File Manifest Release 20180731), <<http://www.nealelab.is/uk-biobank>> (
- 8 Stahl, E. A. *et al.* Genome-wide association study identifies 30 loci associated with bipolar disorder. *Nat Genet* **51**, 793-803, doi:10.1038/s41588-019-0397-8 (2019).
- 9 International League Against Epilepsy Consortium on Complex, E. Genome-wide mega-analysis identifies 16 loci and highlights diverse biological mechanisms in the common epilepsies. *Nat Commun* **9**, 5269, doi:10.1038/s41467-018-07524-z (2018).
- 10 Purcell, S. *et al.* PLINK: a tool set for whole-genome association and population-based linkage analyses. *Am J Hum Genet* **81**, 559-575, doi:10.1086/519795 (2007).
- 11 Leu, C. *et al.* Polygenic burden in focal and generalized epilepsies. *Brain* **142**, 3473-3481, doi:10.1093/brain/awz292 (2019).
- 12 Shakeshaft, A. *et al.* Sex-specific disease modifiers in juvenile myoclonic epilepsy. *Sci Rep* **12**, 2785, doi:10.1038/s41598-022-06324-2 (2022).
